# Supplementary material
Source: PubMed Central journal article supplement (PMC3478375)
Supplement: supp_120801_vary-vanwalraven-1-at.pdf [file supp_120801_vary-vanwalraven-1-at.pdf]

**Appendix (as supplied by the authors): LACE+ point system derived from original cohort containing all discharges versus one discharge per patient, and parameter estimates from logistic regression model with LACE+ score as independent predictor of 30-day death or urgent readmission**

Table 1. LACE+ point system derived on original cohort containing all discharges versus one discharge per patient

LACE+ a validated model, derived and validated in the same setting as our study, that predicted the risk of 30-day death or urgent readmission using a single score that considers the following covariates: length of stay; acuity of admission; comorbidity, measured using the Charlson index; emergency department use in the six months prior to admission; patient age and sex; acute diagnoses and procedures performed during the index admission; number of days on alternative level of care during the index admission; the number of elective and urgent hospitalizations in the year prior to the index admission; and hospital type (teaching vs. large community vs. small community). The LACE+ index was highly discriminative with a C-statistic of 0.771 and was well calibrated for all but 1.5% of validation patients. LACE+ can be calculated using the following point system:

| PREDICTOR                                         | POINTS         |                         |
|---------------------------------------------------|----------------|-------------------------|
|                                                   | All discharges | 1 discharge per patient |
| Male                                              | 2              | 3                       |
| Urgent admission                                  | 13             | 15                      |
| Discharge institution                             |                |                         |
| Teaching hospital or small non-teaching hospital* | 0              | 0                       |
| Large non-teaching hospital**                     | -1             | -1                      |
| Length of stay (days)                             |                |                         |
| <1                                                | 0              | 0                       |
| 1                                                 | 2              | 2                       |
| 2                                                 | 2              | 3                       |
| 3                                                 | 3              | 4                       |
| 4                                                 | 4              | 5                       |
| 5-6                                               | 4              | 6                       |
| 7-10                                              | 5              | 7                       |
| >10                                               | 7              | 9                       |
| CMG score                                         |                |                         |
| <-2                                               | -10            | -13                     |
| -2 -- -1                                          | -5             | -6                      |
| 0                                                 | 0              | 0                       |
| 1-2                                               | 6              | 8                       |
| >2                                                | 19             | 24                      |
| Number of days on ALC status                      |                |                         |
| 0                                                 | 0              | 0                       |
| >0                                                | -1             | -1                      |

|                                                |                |             |    |    |
|------------------------------------------------|----------------|-------------|----|----|
| Number of ED visits in previous 6 months       |                |             |    |    |
| 0                                              |                |             | 0  | 0  |
| 1                                              |                |             | 2  | 3  |
| >1                                             |                |             | 6  | 6  |
| Number of elective admissions in previous year |                |             |    |    |
| 0                                              |                |             | 0  | 0  |
| >0                                             |                |             | 3  | 6  |
| Previous urgent admissions                     | Charlson score | Age (years) |    |    |
| 0                                              | 0              | <32         | 0  | 0  |
|                                                |                | 32-40       | 1  | 2  |
|                                                |                | 41-46       | 3  | 5  |
|                                                |                | 47-52       | 4  | 7  |
|                                                |                | 53-58       | 6  | 9  |
|                                                |                | 59-64       | 7  | 12 |
|                                                |                | 65-69       | 9  | 15 |
|                                                |                | 70-75       | 11 | 18 |
|                                                |                | 76-80       | 13 | 20 |
|                                                |                | >80         | 17 | 27 |
|                                                | 1              | <32         | 8  | 10 |
|                                                |                | 32-40       | 9  | 12 |
|                                                |                | 41-46       | 10 | 15 |
|                                                |                | 47-52       | 11 | 16 |
|                                                |                | 53-58       | 13 | 17 |
|                                                |                | 59-64       | 14 | 20 |
|                                                |                | 65-69       | 16 | 23 |
|                                                |                | 70-75       | 17 | 26 |
|                                                |                | 76-80       | 19 | 27 |
|                                                |                | >80         | 22 | 33 |
|                                                | >1             | <32         | 22 | 30 |
|                                                |                | 32-40       | 23 | 31 |
|                                                |                | 41-46       | 24 | 34 |
|                                                |                | 47-52       | 24 | 34 |
|                                                |                | 53-58       | 25 | 35 |
|                                                |                | 59-64       | 26 | 38 |
|                                                |                | 65-69       | 27 | 40 |
| 70-75                                          |                | 28          | 42 |    |
| 76-80                                          |                | 29          | 42 |    |
| >80                                            |                | 31          | 47 |    |
| >0                                             | 0              | <32         | 19 | 25 |
|                                                |                | 32-40       | 19 | 26 |
|                                                |                | 41-46       | 21 | 27 |
|                                                |                | 47-52       | 21 | 28 |
|                                                |                | 53-58       | 22 | 29 |
|                                                |                | 59-64       | 22 | 30 |
|                                                |                | 65-69       | 23 | 32 |
|                                                |                | 70-75       | 25 | 33 |
|                                                |                | 76-80       | 26 | 35 |

|     |     |       |    |    |
|-----|-----|-------|----|----|
|     | 1   | >80   | 28 | 38 |
|     |     | <32   | 25 | 33 |
|     |     | 32-40 | 25 | 34 |
|     |     | 41-46 | 26 | 35 |
|     |     | 47-52 | 26 | 35 |
|     |     | 53-58 | 27 | 35 |
|     |     | 59-64 | 27 | 36 |
|     |     | 65-69 | 28 | 38 |
|     |     | 70-75 | 29 | 39 |
|     |     | 76-80 | 30 | 40 |
|     | >80 | 31    | 42 |    |
|     | >1  | <32   | 36 | 48 |
|     |     | 32-40 | 36 | 48 |
|     |     | 41-46 | 37 | 49 |
|     |     | 47-52 | 36 | 48 |
|     |     | 53-58 | 36 | 48 |
|     |     | 59-64 | 36 | 49 |
|     |     | 65-69 | 36 | 50 |
|     |     | 70-75 | 37 | 50 |
|     |     | 76-80 | 37 | 50 |
| >80 |     | 37    | 51 |    |

\*non-teaching hospital with < 100 beds

\*\*non-teaching hospital with  $\geq 100$  beds

Table 2. Parameter estimates from logistic regression model with LACE+ score as independent predictor of 30-day death or urgent readmission

|                                            | LACE+ score using point system derived on all discharges | LACE+ score using point system derived on 1 discharge per patient |
|--------------------------------------------|----------------------------------------------------------|-------------------------------------------------------------------|
| Intercept                                  | -3.7572                                                  | -4.6091                                                           |
| 1-unit increase in LACE+ score ( $\beta$ ) | 0.0463                                                   | 0.0437                                                            |

We calculated patients' risk of 30-day death or urgent readmission as the inverse of  $1 + e^{-(\text{intercept} + \beta * \text{LACE+score})}$  using the parameter estimates from the original study shown in Table 2 above.
